# Supplementary material for: Utilization of angiotensin converting enzyme inhibitors (ACEI) and angiotensin receptor blockers (ARB) in patients diagnosed with diabetes: Analysis from the National Ambulatory Medical Care Survey
Source: PubMed Central journal article supplement — Prev Med Rep. 2016 Jan 26;3:166–70. doi: 10.1016/j.pmedr.2016.01.005 (PMC4929215; doi:10.1016/j.pmedr.2016.01.005), 2016-01-26
Supplement: mmc1.pdf [file mmc1.pdf]

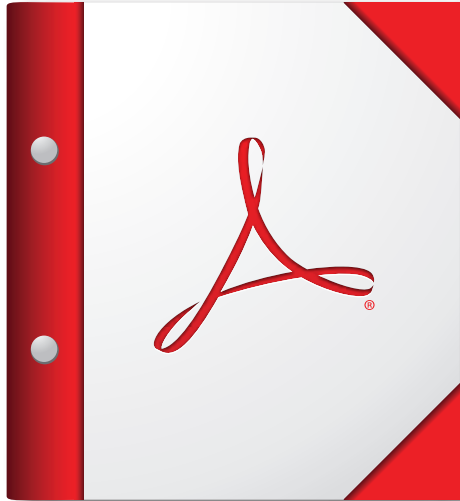

**For the best experience, open this PDF portfolio in  
Acrobat 9 or Adobe Reader 9, or later.**

[Get Adobe Reader Now!](#)
